# Supplementary material
Source: PubMed Central journal article supplement (PMC3546120)
Supplement: NIHMS404289-supplement-Supplementary_Material.pdf [file NIHMS404289-supplement-Supplementary_Material.pdf]

## Supplementary Material for the article

“Epidemiology of Pain among Outpatients in Methadone Maintenance Treatment Programs”

Lara Dhingra,<sup>1</sup> Carmen Masson,<sup>2</sup> David C. Perlman,<sup>3,4,5</sup>  
Randy M. Seewald,<sup>4</sup> Judith Katz,<sup>6</sup> Courtney McKnight,<sup>3,5</sup>  
Peter Homel,<sup>7</sup> Emily Wald,<sup>8</sup> Ashly E. Jordan,<sup>3</sup> Christopher Young,<sup>3</sup>  
Russell K. Portenoy,<sup>9</sup>

<sup>1</sup> Department of Pain Medicine and Palliative Care, Beth Israel Medical Center, First Avenue at 16th Street, New York, NY 10003, Departments of Neurology and Psychiatry and Behavioral Sciences, Albert Einstein College of Medicine, 1300 Morris Park Avenue, Bronx, NY 10461

<sup>2</sup> Department of Psychiatry, University of California at San Francisco, 1001 Potrero Avenue, San Francisco, CA 94110

<sup>3</sup> Baron Edmond de Rothschild Chemical Dependency Institute, Beth Israel Medical Center, First Avenue at 16th Street, New York, NY 10003

<sup>4</sup> Department of Medicine, Beth Israel Medical Center, First Avenue at 16th Street, New York, NY 10003

<sup>5</sup> Center for Drug Use and HIV Research, New York University College of Nursing, 726 Broadway, New York, NY 10003

<sup>6</sup> New York University School of Medicine, 550 First Avenue, New York, NY 10016

<sup>7</sup> Maimonides Medical Center, 4802 Tenth Avenue, Brooklyn, NY 11219

<sup>8</sup> Columbia Teacher's College, 525 West 120th Street, New York, NY 10027

<sup>9</sup> Department of Pain Medicine and Palliative Care, Beth Israel Medical Center, First Avenue at 16th Street, New York, NY 10003, Departments of Neurology and Anesthesiology, Albert Einstein College of Medicine, 1300 Morris Park Avenue, Bronx, NY 10461

Address for correspondence and reprints:

Lara K. Dhingra, Ph.D.  
Department of Pain Medicine and Palliative Care  
Beth Israel Medical Center  
120 East 16<sup>th</sup> Street, 12<sup>th</sup> Floor  
New York, NY 10003  
Tel: 212 844 1429  
Fax: 212 844 1503  
Email: [Ldhingra@chpnet.org](mailto:Ldhingra@chpnet.org)

This material supplements but does not replace the content of the peer-reviewed paper published in *Drug and Alcohol Dependence*

Supplementary Table.

Sociodemographic, substance use and psychosocial characteristics of outpatients undergoing opioid agonist therapy for addiction ( $N = 489$ )

| <b>Characteristic</b>                               | <b>Sample, n (%)</b> |
|-----------------------------------------------------|----------------------|
| Women <sup>a</sup>                                  | 155 (31.8)           |
| Age (mean $\pm$ standard deviation)                 | 45.1 $\pm$ 10.0      |
| Racial/ethnic status                                |                      |
| Non-Hispanic Black                                  | 144 (29.4)           |
| Non-Hispanic White                                  | 176 (36.0)           |
| Hispanic                                            | 148 (30.3)           |
| Other                                               | 21 (4.3)             |
| Education level                                     |                      |
| No high school degree                               | 160 (32.7)           |
| High school degree/higher                           | 329 (67.3)           |
| Income level (annual) <sup>b</sup>                  |                      |
| < \$10,000                                          | 298 (61.6)           |
| $\geq$ \$10,000                                     | 186 (38.4)           |
| Employment status                                   |                      |
| Employed                                            | 78 (15.9)            |
| Unemployed                                          | 369 (75.5)           |
| Retired/homemaker/student                           | 42 (8.6)             |
| Marital status                                      |                      |
| Married                                             | 79 (16.2)            |
| Unmarried                                           | 410 (83.8)           |
| Months enrolled in MMTP (mean $\pm$ SD)             | 34.9 $\pm$ 59.4      |
| Current methadone dose (mg) <sup>c</sup>            | 95.7 $\pm$ 48.9      |
| Intravenous drug use (current & former)             | 343 (70.1)           |
| Endorsed use of illicit drugs in past 30 days       |                      |
| Heroin                                              | 163 (33.3)           |
| Cocaine                                             | 209 (42.7)           |
| Amphetamines                                        | 36 (7.4)             |
| Positive urine drug screening (at study enrollment) |                      |
| Opiates <sup>d</sup>                                | 161 (32.9)           |
| Cocaine                                             | 196 (40.1)           |
| Amphetamines <sup>e</sup>                           | 14 (2.9)             |

|                           |             |
|---------------------------|-------------|
| Homeless in past 6 months |             |
| Yes                       | 199 (40.7)  |
| No                        | 290 (59.3)  |
| Live with partner         |             |
| Yes                       | 162 (33.1)  |
| No                        | 327 (66.9)  |
| BDI-II                    |             |
| Minimal/mild <sup>f</sup> | 260 (53.2)  |
| Moderate/severe           | 229 (46.8)  |
| MOS-SF-12                 |             |
| MCS                       | 38.9 ± 13.2 |
| PCS                       | 46.6 ± 8.8  |

Abbreviations: MMTP, Methadone Maintenance Treatment Program; BDI-II, Beck Depression Inventory-II; MOS-SF-12, Medical Outcomes Survey-Short Form; MCS, Mental Components Summary Score; PCS, Physical Components Summary Score, controlled for bodily pain.

<sup>a,b</sup>Sample sizes for: sex,  $n = 487$ ; income,  $n = 484$ ; <sup>c</sup>methadone dose,  $n = 488$ . <sup>d</sup>Including heroin, codeine, hydrocodone, hydromorphone, morphine, oxycodone, oxymorphone. <sup>e</sup>Including amphetamine, methamphetamine, ecstasy. <sup>f</sup>Cutoff scores: minimal = 0-13; mild = 14-19; moderate = 20-28; severe = 29-63.
